# Supplementary material for: Ag3PO4electrocatalyst for oxygen reduction reaction: enhancement from positive charge
Source: Royal Society of Chemistry journal article supplement (doi:10.1039/c7ra12643c), 2018-01-01
Supplement: c7ra12643c1.pdf [file c7ra12643c1.pdf]

1 Supporting Information

2  $\text{Ag}_3\text{PO}_4$  Electrocatalyst for Oxygen Reduction  
3 Reaction: Enhancement from Positive Charge

4 Yong Qin,<sup>†,‡</sup> Fan Li,<sup>†,‡</sup> Peng Tu,<sup>‡,‡</sup> Yanling Ma,<sup>†</sup> Wenlong Chen,<sup>†</sup> Fenglei Shi,<sup>†</sup> Qian Xiang,<sup>†</sup> Hao

5 Shan,<sup>†</sup> Lifu Zhang,<sup>†</sup> Peng Tao,<sup>†</sup> Chengyi Song,<sup>†</sup> Wen Shang,<sup>†</sup> Tao Deng,<sup>†</sup> Hong Zhu,<sup>\*,†,‡,§</sup> Jianbo

6 Wu,<sup>\*,†,§</sup>

7 <sup>†</sup>State Key Laboratory of Metal Matrix Composites, School of Materials Science and Engineering,

8 Shanghai Jiao Tong University, 800 Dongchuan Rd, Shanghai, 200240, People's Republic of China.

9 <sup>‡</sup>University of Michigan – Shanghai Jiao Tong University Joint Institute, Shanghai

10 Jiao Tong University, 800 Dongchuan Road, Shanghai, 200240, P. R. China

11 <sup>§</sup>Materials Genome Initiative Center, Shanghai Jiao Tong University, 800 Dongchuan

12 Road, Shanghai, 200240, P. R. China

13 \*E-mail: jianbowu@sjtu.edu.cn

14 \*E-mail: hong.zhu@sjtu.edu.cn

15 #These authors contribute equally to this work

16 Correspondence and requests for materials should be addressed to J. B. Wu, H. Zhu

17

18

19

20

21

22

23

24

25

26

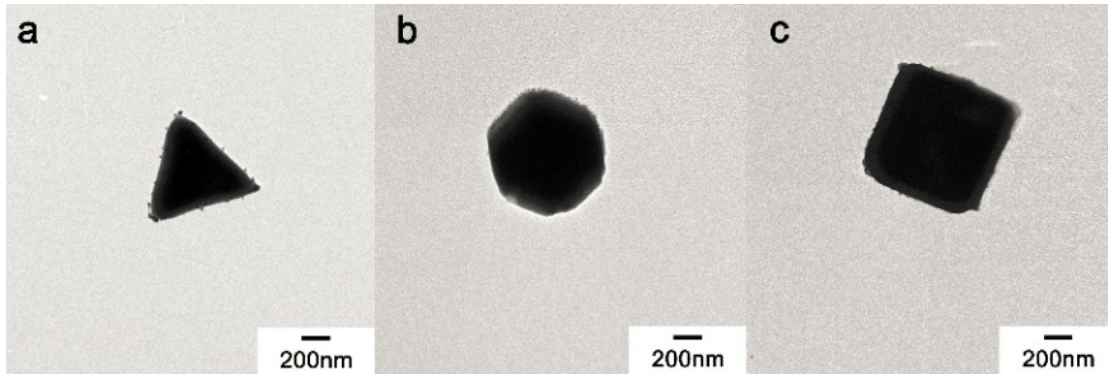

27  
 28 **Figure S1.** TEM micrograph of  $\text{Ag}_3\text{PO}_4$  crystals (a) tetrahedron, (b) rhombic  
 29 dodecahedron, (c) cube

30 As shown in **Figure S1**,  $\text{Ag}_3\text{PO}_4$  tetrahedron, rhombic dodecahedron, and cube with  
 31 regular structures have been fabricated. These three types' plane projection draws are  
 32 triangle, hexagon and quadrangle, respectively. These results are consistent with the  
 33 SEM images of crystals in Figure 1.

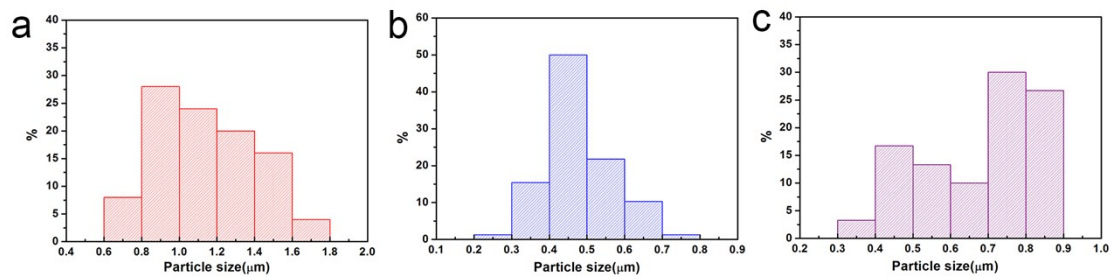

34  
 35 **Figure S2.** Particle size distribution of  $\text{Ag}_3\text{PO}_4$  with different facets: (a) tetrahedron  
 36 (b) rhombic dodecahedron (c) cube.

37 The size distribution of  $\text{Ag}_3\text{PO}_4$  with different facets is counted according to SEM  
 38 micrographs of different  $\text{Ag}_3\text{PO}_4$  crystals. The particle sizes follow a normal  
 39 distribution as shown in **Figure S2**. And the average size is applied to the calculation  
 40 of atomic activity about different  $\text{Ag}_3\text{PO}_4$  crystals.

41

42

43

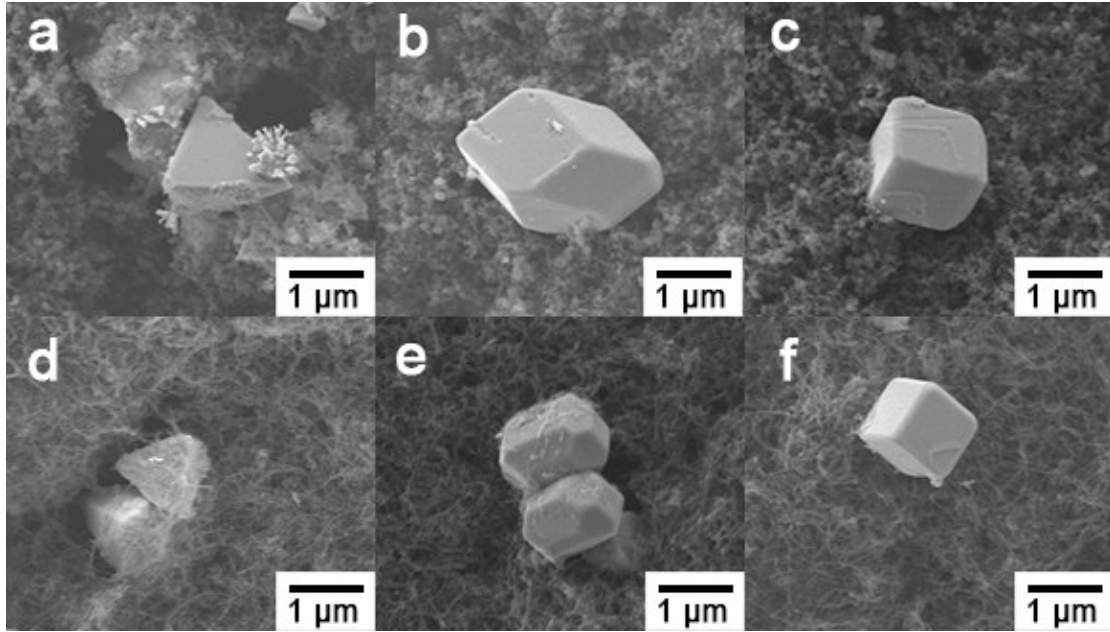

44

45 **Figure S3.** SEM micrograph of (a, b, c)  $\text{Ag}_3\text{PO}_4/\text{C}$  and (d, e, f)  $\text{Ag}_3\text{PO}_4/\text{CNT}$ . (a, d)  
 46 tetrahedron; (b, e) rhombic dodecahedron; (c, f) cube

47 Figure S3 shows the SEM images of  $\text{Ag}_3\text{PO}_4/\text{C}$  and  $\text{Ag}_3\text{PO}_4/\text{CNT}$ . We can find that  
 48 the carbon is amorphous, while the carbon nanotube is slender tubular. And the  
 49  $\text{Ag}_3\text{PO}_4$  crystals with different facet were dispersed in carbon and carbon nanotube,  
 50 respectively.

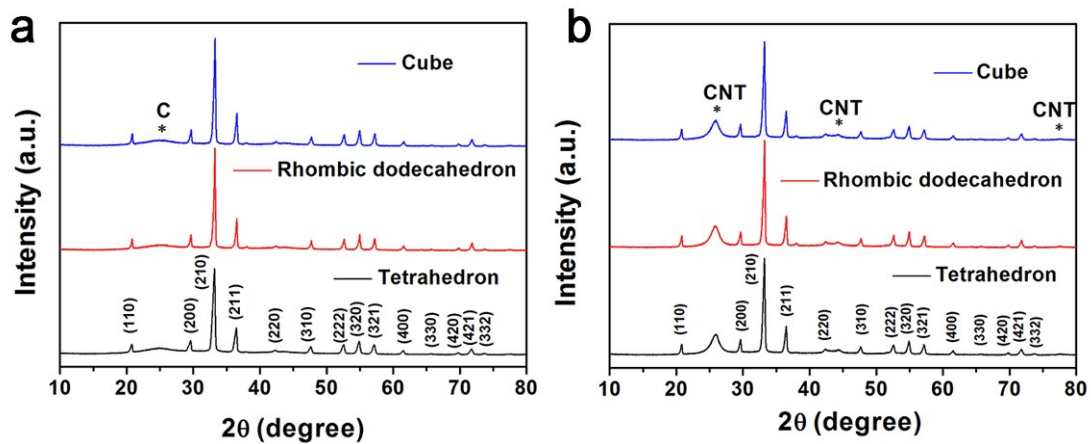

51

52 **Figure S4.** XRD pattern of (a)  $\text{Ag}_3\text{PO}_4/\text{C}$  and (b)  $\text{Ag}_3\text{PO}_4/\text{CNT}$ .

53 The XRD pattern shows that all of the diffraction peaks could be indexed to

54  $\text{Ag}_3\text{PO}_4/\text{C}$  (Figure S4a) and  $\text{Ag}_3\text{PO}_4/\text{CNT}$  (Figure S4b).

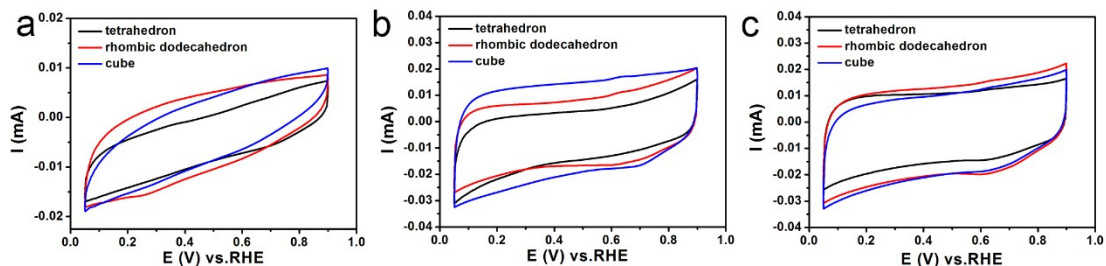

55

56 **Figure S5.** CV curves of tetrahedral, rhombic dodecahedral and cubic  $\text{Ag}_3\text{PO}_4$   
 57 catalysts (a) pure  $\text{Ag}_3\text{PO}_4$ , (b)  $\text{Ag}_3\text{PO}_4/\text{C}$ , (c)  $\text{Ag}_3\text{PO}_4/\text{CNT}$ . The mass of  $\text{Ag}_3\text{PO}_4$  is 10  
 58  $\mu\text{g}$

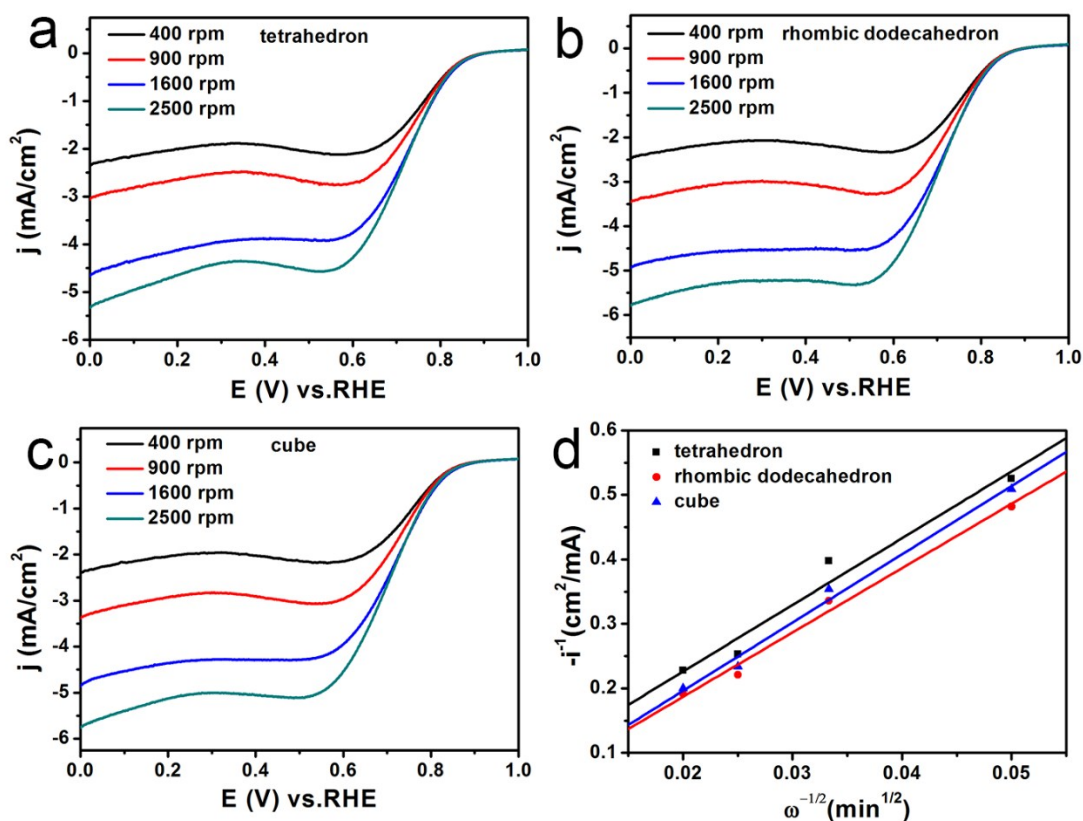

59

60 **Figure S6.** RDE voltammograms for the ORR of (a) tetrahedral, (b) rhombic  
 61 dodecahedral and (c) cubic,  $\text{Ag}_3\text{PO}_4/\text{CNT}$  electrocatalysts at various rotation rates,  
 62 (d) Koutecky–Levich plots of the rotating disk current at 0.3 V (vs. RHE). The tests  
 63 were conducted in  $\text{O}_2$ -saturated 0.1 M KOH solution and the scan rate was kept at 10  
 64  $\text{mV/s}$

65 Meanwhile, we test the  $\text{Ag}_3\text{PO}_4/\text{CNT}$  catalysts ORR performance of rotation speed of  
 66 RDE from 400 to 2500 rpm shown as **Figure S4**. From the ORR curve, the numerical  
 67 value of  $n$  was calculated to be 2.8, 2.9 and 2.7, respectively, for tetrahedral, rhombic  
 68 dodecahedral and cubic of  $\text{Ag}_3\text{PO}_4/\text{CNT}$  catalysts at 0.3V (vs. RHE).

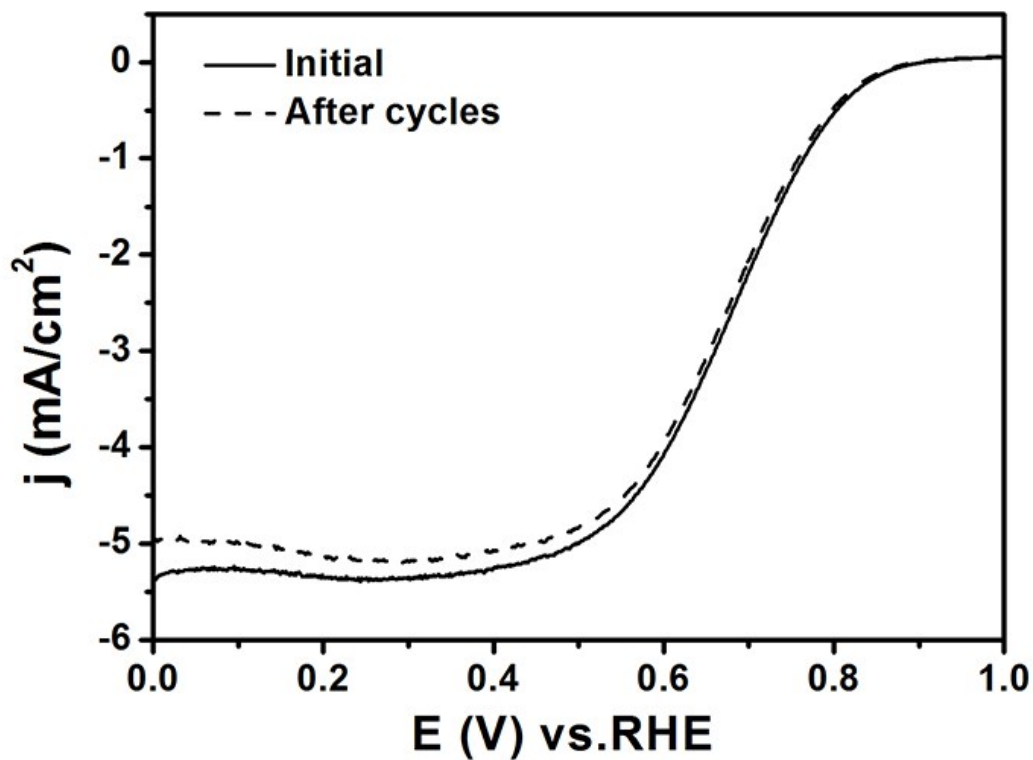

69

70 Figure S7. ORR stability of as-prepared  $\text{Ag}_3\text{PO}_4/\text{CNT}$  catalyst after 5000 cycles.

71 The long-term stability of catalyst was evaluated through accelerated durability test

72 (ADT) by applying cyclic potential sweep between 0.6 and 1.0 V vs. RHE in an Ar-

73 saturated 0.1 M KOH solution at room temperature. We can obtain the reduced 12.5%

74 mass activity from Figure S7 after 5000 cycles.

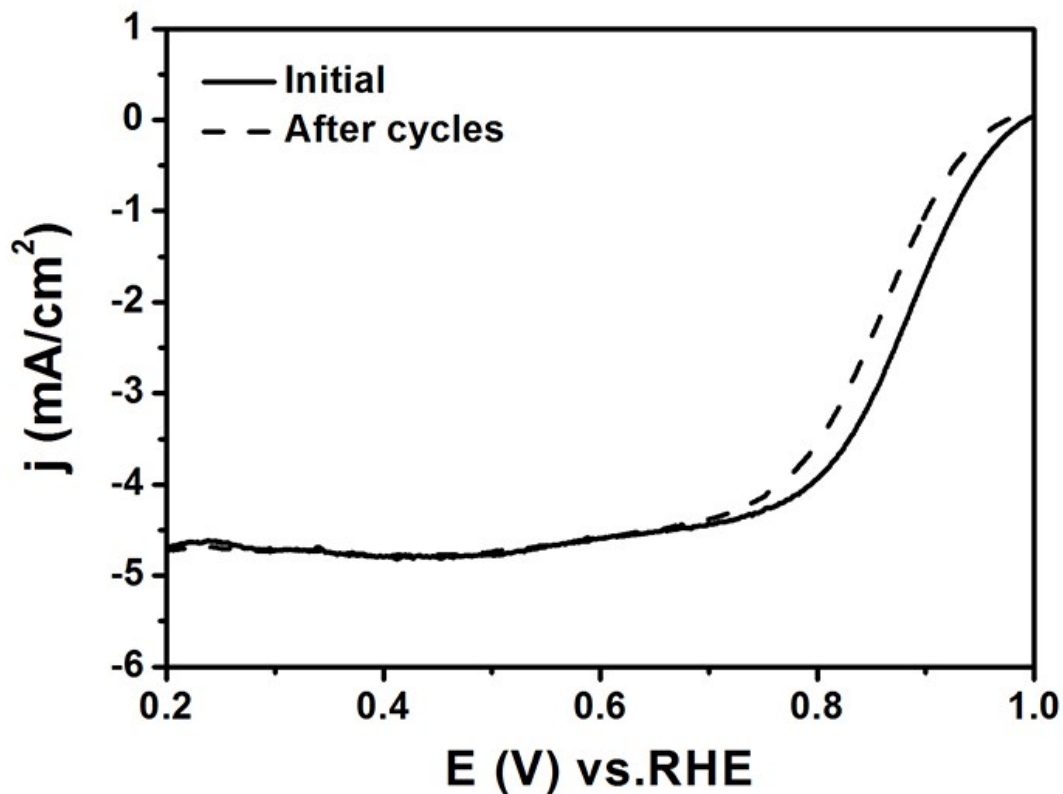

75

76 Figure S8. ORR stability of commercial Pt/C catalyst after 5000 cycles.

77 After 5000 cycles, the mass activity of commercial Pt/C was reduced 36% from

78 Figure S8. Compared to commercial Pt/C, the rhombic dodecahedral  $\text{Ag}_3\text{PO}_4/\text{CNT}$

79 catalyst possesses better stability.

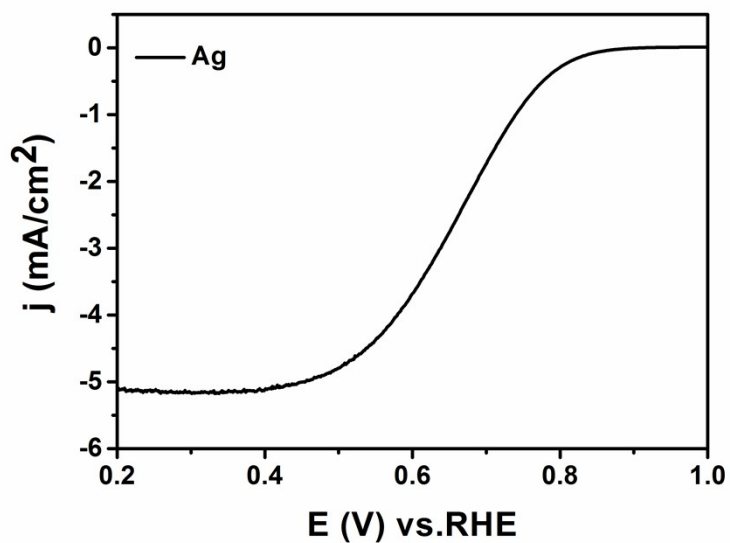

80

81 **Figure S9.** ORR Polarization curve of Ag in 0.1 M KOH

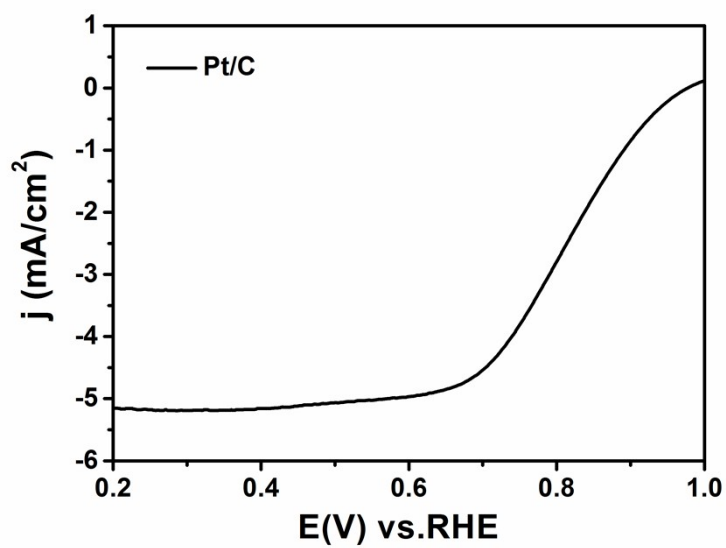

82

83 **Figure S10.** ORR polarization curve of Pt/C in 0.1 M KOH.

84

85

86

87

88

89

90

91

92

93

94

95

96

97

98

99

100

101

102

103

104

105

106

107

108

109

110

111

112 **Table S1.** Kinetic current ( $I_k$ ) of Ag, Pt/C catalysts in 0.1 mol/L KOH.

| Sample | Metal loading( $\mu\text{g}$ ) | $I_k$ (mA) | Mass activity (mA/ $\mu\text{g}$ ) at 0.8 V |
|--------|--------------------------------|------------|---------------------------------------------|
| Ag     | 10                             | 0.06070    | 0.00607                                     |
| Pt/C   | 8                              | 1.19600    | 0.14950                                     |

113 **Table S2.** Atomic activity and relevant parameters

| Facet                                                                | $\text{Ag}_3\text{PO}_4\{111\}$ | $\text{Ag}_3\text{PO}_4\{110\}$ | $\text{Ag}_3\text{PO}_4\{100\}$ |
|----------------------------------------------------------------------|---------------------------------|---------------------------------|---------------------------------|
| Average size(nm)                                                     | 1140                            | 478.2                           | 676.7                           |
| Shape                                                                | tetrahedron                     | rhombic<br>dodecahedron         | cube                            |
| Volume of single<br>crystal( $\text{\AA}^3$ ), $V$                   | $1.7460 \times 10^{11}$         | $3.3672 \times 10^{11}$         | $3.0988 \times 10^{11}$         |
| Density of $\text{Ag}_3\text{PO}_4$ (g/ $\text{cm}^3$ ),<br>$\rho$   | 6.08                            | 6.08                            | 6.08                            |
| Total Ag Atoms in single<br>crystal, $Ag_{total}$                    | $1.75 \times 10^9$              | $6.51 \times 10^9$              | $3.31 \times 10^9$              |
| Surface area of single<br>crystal ( $\text{\AA}^2$ ), $Ag_{surface}$ | $2.251 \times 10^8$             | $2.587 \times 10^8$             | $2.748 \times 10^8$             |
| Ag atom density(atom/ $\text{\AA}^2$ ),<br>$\omega$                  | 0.046305                        | 0.075615                        | 0.053468                        |
| Outmost Ag atomic<br>ratio(%), $i$                                   | 0.228                           | 0.222                           | 0.181                           |
| Loading of $\text{Ag}_3\text{PO}_4$ ( $\mu\text{g}$ ), $m$           | 10                              | 10                              | 10                              |
| Total Ag Atoms, $Ag_{loading}$                                       | $4.31608 \times 10^{16}$        | $4.31608 \times 10^{16}$        | $4.31608 \times 10^{16}$        |
| Ag atoms involved in the<br>reaction, $Ag_{involved}$                | $1.35525 \times 10^{14}$        | $1.05744 \times 10^{14}$        | $1.04017 \times 10^{14}$        |
| Kinetic current(mA), $I_k$                                           | 0.0359                          | 0.0431                          | 0.0270                          |
| Atomic activity<br>(mA/atom $_{\text{Ag}}$ ), $i_{k,atom}$           | $3.65137 \times 10^{-16}$       | $4.50425 \times 10^{-16}$       | $3.45801 \times 10^{-16}$       |

114 **Table S2** shows the relevant parameters of calculation of atomic activity. According  
 115 to particle size distribution of  $\text{Ag}_3\text{PO}_4$  with different facets, we can obtain the average  
 116 size. Combined with the shape, the volume of single crystal is received. So that Ag  
 117 atomic ratio on the surface can be obtained according to following formula:



$$118 \quad Ag_{total} = \frac{\rho \cdot V}{M_{Ag_3PO_4}} \cdot N_A \cdot 3 \quad (1)$$

$$119 \quad Ag_{surface} = S \cdot \omega \quad (2)$$

$$120 \quad i = \frac{Ag_{surface}}{Ag_{total}} \times 100\% \quad (3)$$

121 where  $Ag_{total}$  is the total number of Ag atoms in single crystal,  $\rho$  is density of  $Ag_3PO_4$ ,  
 122  $V$  is the volume of single crystal,  $M_{Ag_3PO_4}$  is molecular weigh of  $Ag_3PO_4$ ,  $N_A$  is  
 123 Avogadro's number,  $Ag_{surface}$  means the number of outmost Ag atoms on the surface  
 124 of single crystal,  $S$  is the surface area of single crystal,  $\omega$  is the surface Ag atom density,  
 125  $i$  means outmost Ag atomic ratio.

126 The loading mass of  $Ag_3PO_4$  is 10  $\mu g$ , which means the loading of Ag and the number  
 127 of Ag atoms involved in the reaction can be received. Assume that all Ag atoms on  
 128 the surface are involved in the reaction, so the catalytic atomic activity of single Ag  
 129 atom on the surface can be calculated according to the following formula:

$$130 \quad Ag_{loading} = \frac{m}{M_{Ag_3PO_4}} \cdot 3 \quad (4)$$

$$131 \quad Ag_{involved} = Ag_{loading} \cdot i \quad (5)$$

$$132 \quad i_{k,atom} = \frac{I_K}{Ag_{involved}} \quad (6)$$

133 where  $Ag_{loading}$  is the total number of Ag atoms of loading on the RDE,  $m$  is the  
 134 loading mass of  $Ag_3PO_4$ ,  $Ag_{involved}$  is the number of Ag surface atoms involved in the  
 135 reaction,  $I_k$  is kinetic current,  $i_{k,atom}$  is catalytic atomic activity of single Ag atom on  
 136 the surface.

137 **Table S3.** Atomic activity and parameters of pure Ag

| Materials                                              | Pure Ag                   |
|--------------------------------------------------------|---------------------------|
| Average size (nm)                                      | 23.7                      |
| Kinetic current(mA), $I_k$                             | 0.0607                    |
| Atomic activity (mA/atom <sub>Ag</sub> ), $i_{k,atom}$ | $5.99961 \times 10^{-17}$ |

138

### 139 **Computational Method**

140 The density functional theory (DFT) calculations with the Perdew-Burke-Ernzerhof  
141 (PBE)<sup>1</sup> generalized gradient approximation (GGA) and projector augmented wave  
142 (PAW)<sup>2</sup> pseudopotentials were performed within the Vienna Ab Initio Simulation  
143 Package (VASP). For all Ag<sub>3</sub>PO<sub>4</sub> slabs considered, namely {111}, {110}, and {100}  
144 surfaces, the energy cut-off for the plane wave expansion of 520 eV, a 4\*2\*1 k-point  
145 mesh and a vacuum region of 20 Å were used.

146 To study the O adsorption on the three surfaces, we placed the O atom onto the 2\*1  
147 slabs. For each slab with adsorbate, several possible adsorption sites were considered,  
148 including top, bridge, and hollow (see Figure 5 and **Table S4** for more details).

149 The adsorption energy ( $E_{ads}$ ) is calculated from the total energy difference between  
150 the slab with the adsorbate ( $E_{Ag_3PO_4-O}$ ), the slab without the adsorbate ( $E_{Ag_3PO_4}$ ), and  
151 the adsorbate in the gas phase ( $E_{O_2}$ ). Therefore, the adsorption energy can be written  
152 as

$$153 \quad E_{ads} = E_{Ag_3PO_4-O} - E_{Ag_3PO_4} - \frac{1}{2}E_{O_2} \quad (7)$$

154 The preferential adsorption energy for Ag<sub>3</sub>PO<sub>4</sub> {111}, {110}, and {100} surfaces, i.e.  
155 the adsorption energy for most favored adsorption site, is -2.151 eV, -0.830 eV, -

156 2.996 eV, respectively. The most preferential adsorption sites are bolded in Table S4.

157 Our volcano plot combining the adsorption energy and atomic activity is shown in

158 Figure 4e. It's obvious that the number of the stable site in one slab accounts for the

159 highest proportion.

160

161

162 **Table S4.** Adsorption energy for O on Ag<sub>3</sub>PO<sub>4</sub> {111}, {110} and {100}.

| Surface Orientation | Adsorption sites | $E_{ads}$     |
|---------------------|------------------|---------------|
| {111}               | Ag-top           | <b>-2.151</b> |
|                     | Ag-Ag_bridge1    | 1.834         |
|                     | Ag-Ag_bridge2    | 2.424         |
|                     | Ag_hollow1       | 2.050         |
| Surface Orientation | Adsorption sites | $E_{ads}$     |
| {110}               | Ag_top1          | 1.925         |
|                     | Ag_top2          | <b>-0.830</b> |
|                     | Ag_top3          | 1.232         |
|                     | Ag_top4          | 4.292         |
|                     | Ag-Ag_bridge1    | -0.011        |
|                     | Ag-Ag_bridge2    | 2.254         |
|                     | Ag-Ag_bridge3    | -0.426        |
|                     | Ag-Ag_bridge4    | 4.574         |
| Surface Orientation | Adsorption sites | $E_{ads}$     |
| {100}               | Ag_top           | 0.642         |
|                     | P_top            | 2.163         |
|                     | Ag-Ag_bridge     | 0.016         |
|                     | P-P_bridge1      | 0.822         |
|                     | P-P_bridge2      | 2.775         |
|                     | P-Ag_bridge      | <b>-2.996</b> |

163 Note: 1. Preferential adsorption sites are bolded.

164 2. All the units of energies are eV.

165 **Table S5.** Adsorption energy for O on pure Ag

| Adsorption sites | $E_{ads}$     |
|------------------|---------------|
| bridge           | -0.243        |
| fcc              | -0.398        |
| hcp              | <b>-0.493</b> |
| top              | 1.058         |

166 **Reference:**

- 167 1 J. P. Perdew, K. Burke and M. Ernzerhof, *Phys. Rev. Lett.*, 1997, **78**, 1396-1396.  
168 2 P. E. Blöchl, O. Jepsen and O. K. Andersen, *Physical Review B*, 1994, **49**, 16223-16233.

169
